# Glucocorticoid Up-Regulates Transforming Growth Factor- $\beta$ (TGF- $\beta$ ) Type II Receptor and Enhances TGF- $\beta$ Signaling in Human Prostate Cancer PC-3 Cells

Zongbin Li, Yuxia Chen, Dongmei Cao, Yan Wang, Guangchun Chen, Shimin Zhang, and Jian Lu

Department of Pathophysiology (Z.L., Y.C., D.C., Y.W., G.C., J.L.), the Second Military Medical University, Shanghai 200433, People's Republic of China; and American Registry of Pathology at Armed Forces Institute of Pathology (S.Z.), Washington, D.C. 20306

Previous studies have shown that dexamethasone (Dex) induces the expression of TGF- $\beta$ 1 in androgen-independent prostate cancer both *in vitro* and *in vivo*. However, it is not clear whether Dex has a direct effect on the expression of TGF- $\beta$  receptors. In this study, using the androgen-independent human prostate cancer cell line, PC-3 cells, we demonstrated that Dex increased the expression of TGF- $\beta$  receptor type II (T $\beta$ RII), but not TGF- $\beta$  receptor type I (T $\beta$ RI) in a time- and dose-dependent manner. The up-regulation of T $\beta$ RII expression by Dex was mediated by glucocorticoid receptor and occurred at the transcriptional level. Dex also enhanced TGF- $\beta$ 1 signaling and increased the expression of cyclin-dependent kinase inhibitors p15<sup>INK4B</sup> (p15) and p27<sup>KIP1</sup> (p27), which are the target genes of TGF- $\beta$ 1 and have been identified

as inducers of cell cycle arrest at the G1 checkpoint. The antiproliferative effect of Dex was partially blocked by anti-T $\beta$ RII antibody, indicating that elevated T $\beta$ RII and TGF- $\beta$ 1 signaling were involved in the antiproliferative effect of Dex. Because the TGF- $\beta$ 1 pathway could not fully explain the antiproliferative effect of Dex, we further examined the effects of Dex on the transcriptional activity of nuclear factor- $\kappa$ B (NF- $\kappa$ B) and the expression of IL-6 and found that Dex suppressed the transcriptional activity of NF- $\kappa$ B and IL-6 mRNA expression in PC-3 cells. These results demonstrated that glucocorticoid inhibited the proliferation of PC-3 cells not only through enhancing growth-inhibitory TGF- $\beta$ 1 signaling, but also through suppressing transcriptional activities of NF- $\kappa$ B. (*Endocrinology* 147: 5259–5267, 2006)

GLUCOCORTICOIDS ARE KNOWN to inhibit both *in vivo* and *in vitro* growth of certain normal and transformed cell lines. In addition to their well-documented cytotoxic effect on hematological cells (1), glucocorticoids also exert an antiproliferative effect on osteosarcoma cells (2–4), certain hepatoma cells (5, 6), and mammary (7), ovarian (8–10), and prostate cancer cells (11–13). However, the mechanism responsible for the antiproliferative effect of glucocorticoids on tumors remains unclear.

Previous studies showed that glucocorticoids such as dexamethasone (Dex) have antiproliferative effects on androgen-independent prostate cancer (AIPC) *in vitro* and *in vivo*, suggesting their therapeutic potential on AIPC. Indeed, glucocorticoids have been used in the treatment of advanced prostate cancer in several randomized studies (14). It is well known that glucocorticoid receptor (GR) mediates glucocorticoid action by regulating the expression of target genes (15–17). Although previous experiments have indicated that the majority of commonly used prostate cancer cell lines express functional GR, a few target genes have been known

to mediate the antiproliferative effect of glucocorticoids on prostate cancer cells (13, 14).

TGF- $\beta$ 1 is an inhibitory growth factor in normal prostate epithelial cells and some prostate cancer cells (18, 19). It has two types of transmembrane receptors: T $\beta$ RI and T $\beta$ RII, and both have serine/threonine kinase activity (20). Binding of TGF- $\beta$ 1 to constitutively active T $\beta$ RII leads to recruitment, interaction, and phosphorylation of T $\beta$ RI, thus initiating a cascade of molecular events, such as phosphorylation of downstream Smad proteins, including Smad2 or Smad3. The phosphorylated Smad2 or Smad3 combines with Smad4, and then translocates to the nucleus to regulate the transcription of target genes (21–24). The growth inhibitory effect of TGF- $\beta$ 1 is mediated by regulating the expression of cell cycle regulators, such as some members of the cyclin-dependent kinase inhibitor (CKI) family, which in turn result in cell cycle lengthening and growth arrest of normal and neoplastic prostate cells.

Human prostate surface epithelial cells and stromal cells produce TGF- $\beta$ 1. The epithelial cells predominantly express TGF- $\beta$  receptors, suggesting that proliferation and other activities of epithelial cells may be affected by autocrine and paracrine TGF- $\beta$ 1 signals (25–27). Moreover, several studies (10, 11) showed that glucocorticoids induced expression of TGF- $\beta$ 1 in androgen-insensitive prostate cancer cell lines, such as PA-III and PC-3 cell lines. Recently, we found that Dex not only inhibited the proliferation of PC-3 cells, which had been reported before by another laboratory (11), but also enhanced the antiproliferative effect of TGF- $\beta$ 1 on these cells. We therefore hypothesized that the antiproliferative effect of

First Published Online August 3, 2006

Abbreviations: AIPC, Androgen-independent prostate cancer; CDK, cyclin-dependent kinase; CKI, cyclin-dependent kinase inhibitor; Dex, dexamethasone; GAPDH, glyceraldehyde-3-phosphate dehydrogenase; GR, glucocorticoid receptor; GRE, glucocorticoid response element; MTT, 3-(4,5-dimethylthiazol-2-yl)-2,5-diphenyltetrazolium bromide; NF- $\kappa$ B, nuclear factor- $\kappa$ B; p15, p15<sup>INK4B</sup>; p27, p27<sup>KIP1</sup>; T $\beta$ RI, TGF- $\beta$  receptor type I; T $\beta$ RII, TGF- $\beta$  receptor type II.

*Endocrinology* is published monthly by The Endocrine Society (<http://www.endo-society.org>), the foremost professional society serving the endocrine community.

Dex may be also through positively regulating TGF- $\beta$ 1 signaling and enhancing the sensitivity of PC-3 cells to TGF- $\beta$ 1.

In the present study, we examined effects of Dex on the expression of TGF- $\beta$ 1 receptors and target genes of the TGF- $\beta$ 1 signaling pathway in androgen-insensitive PC-3 cells to explore the mechanism for the antiproliferative effect of Dex on these cells.

## Materials and Methods

### Cell culture

PC-3 human prostate cancer cells (ATCC, Manassas, VA) were cultured in RPMI-1640 (Invitrogen, Carlsbad, CA) supplemented with 10% fetal bovine serum and 1% penicillin and streptomycin in a 5% CO<sub>2</sub> and 37 C incubator. Dex (Sigma Chemical Co., St. Louis, MO) was dissolved in ethanol before addition to the culture medium. The final ethanol concentration was 0.1%. TGF- $\beta$ 1 (Peprotech, Rocky Hill, NJ) was diluted in the culture medium and stored at 4 C before addition to cultures.

### Cell proliferation assay

The proliferation of PC-3 cells was determined by counting the cell number with a hemacytometer. Cells were seeded into 35-mm tissue culture dishes at a density of  $4 \times 10^4$  cells/dish in 2 ml medium. Dex or TGF- $\beta$ 1 was added to the cultures 24 h later to give the final concentration of 100 nM (Dex) or 10 ng/ml (TGF- $\beta$ 1). Control cells were treated with the same volume of the vehicle (ethanol for Dex). At set time points, cells were trypsinized, resuspended in the medium, and counted.

### Semiquantitative analysis of mRNA by RT-PCR

Cells were washed with ice-cold PBS once and total RNA was isolated with TRIzol (Invitrogen) according to the instructions of the manufacturer. About 2  $\mu$ g RNA were treated with ribonuclease-free deoxyribonuclease, and cDNA was synthesized by using Moloney murine leukemia virus reverse transcriptase (Invitrogen Life Technologies, Carlsbad, CA), and 2  $\mu$ l of synthesized cDNA was subjected to 30 cycles of PCR that resulted in a single specific amplification product of the expected size. The PCR conditions were as follows: 30 sec denaturation at 94 C, 1 min annealing at 55 C (T $\beta$ RI, T $\beta$ RII, and p15) or 58 C (IL-6), and 45 sec extension at 72 C. PCR primers used in this study are as follows: T $\beta$ RI, sense 5'-CGTGCTGACATCTATGCAAT-3' and antisense 5'-AGCTGCTCCATTGGCATAAC-3'; T $\beta$ RII, sense 5'-GCACGTTCA-GAAGTCGGTT-3' and antisense 5'-AGATATGGCAACTCCCAGT-GGT-3'; p15, sense 5'-GGCGCGCGATCCAGGTCA-3' and antisense 5'-GAACCTGGCGTCAGTCCC-3'; IL-6, sense 5'-TGACCCCAACCA-CAAATGC-3' and antisense 5'-CTGGCTGTGAAACAAAGGAT-3'. Glyceraldehyde-3-phosphate dehydrogenase (GAPDH) was used as an internal control of the PCR. The primers for GAPDH were sense 5'-CTGCACCACCAACTGCTTAG-3' and antisense 5'-TTCAGCTCA-GGGATGACCTT-3'.

To determine the specificity of RT-PCRs, we performed the amplifications three times and took the mean value of these three reactions. The RT-PCRs were in the linear range of amplification for the target mRNA as well as for the control. Each RT-PCR product was demonstrated on 1.4% agarose gel stained with ethidium bromide. The bands were documented, scanned, quantified using Quantity One software (PDI, New York, NY) and normalized with internal control GAPDH.

### Western blot analysis

Cells were lysed in ice-cold lysis buffer [10 mM Tris (pH 7.5), 0.1 mM EDTA, 0.1 mM EGTA, 0.5% SDS, 0.1 mM  $\beta$ -mercaptoethanol, containing 2  $\mu$ g/ml of each of the protease inhibitors, leupeptin, aprotinin, and pepstatin] for 10 min. Protein concentrations in the cell lysates were measured using the Bio-Rad protein determination assay. Twenty micrograms of protein were separated by SDS-PAGE, transferred to nitrocellulose membranes (Schleicher and Schuell, Inc., Burlington, VT), and immunoblotted with various primary antibodies. Antibodies to T $\beta$ RII and p27 were obtained from Santa Cruz Biotechnology, Inc. (Santa Cruz, CA). The blots were further incubated with alkaline phosphatase-

conjugated goat antimouse or antirabbit IgG (Bio-Rad Laboratories, Hercules, CA) and colorized with phosphatase substrate BCIP (5-bromo-4-chloro-3-indolyl phosphate)-Nitro Blue Tetrazolium.

### T $\beta$ RII antibody neutralizing assay

PC-3 cells were seeded into 96-well plates at a density of  $1 \times 10^3$  cells/well in 0.2 ml medium with 20  $\mu$ g/ml T $\beta$ RII neutralizing antibody (R&D Systems, Minneapolis, MN) or with control IgG of the same subtype as the anti-T $\beta$ RII antibody (R&D Systems). After a 3-h incubation, 100 nM Dex or 10 ng/ml TGF- $\beta$ 1 was added. Cells were allowed to grow for 6 d, and medium was renewed every other day. The 3-(4,5-dimethylthiazol-2-yl)-2,5-diphenyltetrazolium bromide (MTT) reduction method was used to determine cell proliferation.

### Transfection and luciferase reporter assay

PC-3 cells were plated in triplicate into a 24-well plate at a density of  $5 \times 10^4$  cells/well. After overnight culture, the cells were transiently transfected with 1  $\mu$ g/well of T $\beta$ RII promoter (-1883/+50) driven luciferase reporter plasmid (kindly provided by Dr. J. W. Freeman) using Lipofectamine plus transfection reagent (Invitrogen). To normalize the transfection efficiency, pRL-TK-Renilla-luc (30 ng/well; Promega, Madison, WI) was cotransfected into the cells. Cells were grown for 12 h and then treated with 1–100 nM Dex for another 24 h. For detecting TGF- $\beta$ 1 signaling activity, cells were cotransfected with 300 ng/well of p3TP-Luc (kindly provided by Dr. J. Massague) and 30 ng/well of pRL-TK-Renilla-luc, and treated with 100 nM Dex or 10 ng/ml TGF- $\beta$ 1 for 24 h. The luciferase activities were determined using the dual luciferase assay system. Values were normalized by Renilla luciferase and reported as fold induction over control.

For assessing the transcriptional activity of nuclear factor- $\kappa$ B (NF- $\kappa$ B), PC-3 cells ( $2 \times 10^5$ /well) were cotransfected in 24-well plates with 0.4  $\mu$ g of NF- $\kappa$ B promoter driven firefly luciferase reporter construct and 1 ng of pRL-TK-Renilla-luc by a lipofectamine method (Invitrogen). After incubation for 12 h, cells were washed with fresh medium and treated with different concentrations of Dex or ethanol vehicle for 18 h or with 100 nM Dex for different periods of time.

### Statistical analysis

Statistical analysis was performed using one-way ANOVA followed by Fisher's least significant difference test, and  $P < 0.05$  was considered significant. Data are expressed as the means  $\pm$  SD. \* or #,  $P < 0.05$ .

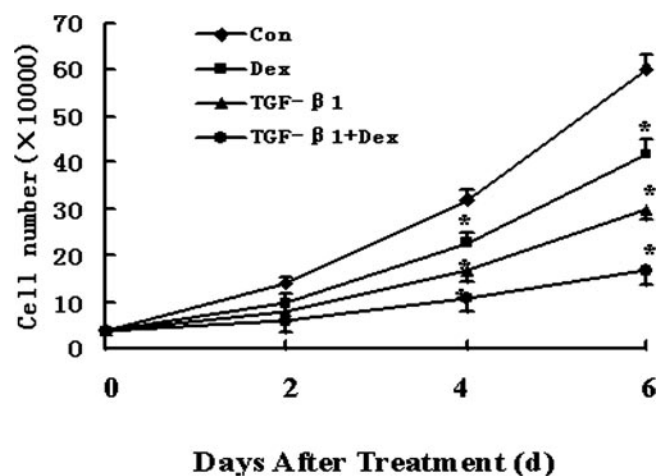

FIG. 1. Inhibitory effects of Dex and TGF- $\beta$ 1 on the growth of PC-3 prostate cancer cells. PC-3 cells cultured in 35-mm plates were treated with 100 nM Dex or/ and 10 ng/ml TGF- $\beta$ 1 for 2, 4 or 6 d. At set time points, cell number in cultures were counted as described in *Materials and Methods*. Cell viability (>98%) was determined by the trypan blue exclusion method. Each point represents the means  $\pm$  SD of triplicate determinations, and  $P < 0.05$ . \*, Statistically significant difference as compared with the control group.

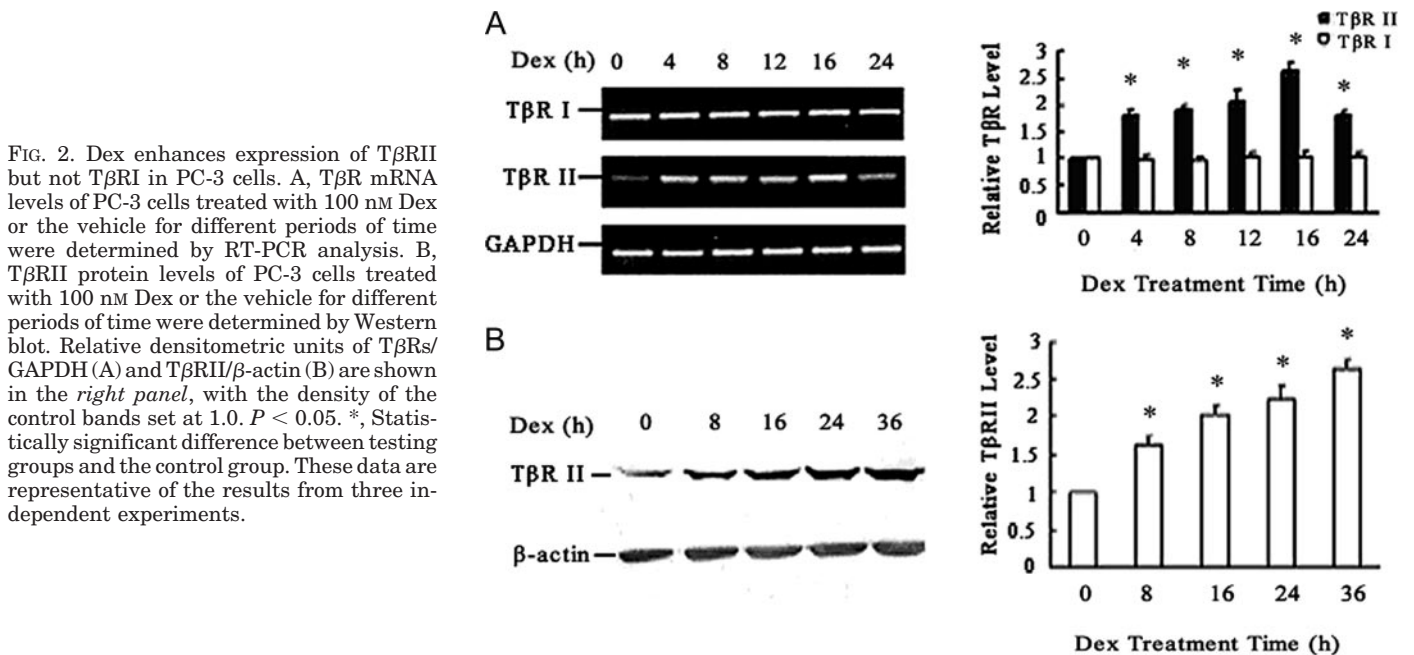

FIG. 2. Dex enhances expression of TβRII but not TβRI in PC-3 cells. A, TβR mRNA levels of PC-3 cells treated with 100 nM Dex or the vehicle for different periods of time were determined by RT-PCR analysis. B, TβRII protein levels of PC-3 cells treated with 100 nM Dex or the vehicle for different periods of time were determined by Western blot. Relative densitometric units of TβRs/GAPDH (A) and TβRII/β-actin (B) are shown in the right panel, with the density of the control bands set at 1.0.  $P < 0.05$ . \*, Statistically significant difference between testing groups and the control group. These data are representative of the results from three independent experiments.

**Results**

*Dex and TGF-β1 inhibit PC-3 cell proliferation*

Effects of Dex or TGF-β1 on the growth of PC-3 prostate cancer cells were examined. As illustrated in Fig. 1, treatment of PC-3 cells with 100 nM Dex or 10 ng/ml TGF-β1 resulted in decreasing cell proliferation in a time-dependent manner. Cell numbers in Dex- and TGF-β1-treated groups at d 6 were 35% and 50% less than that in the control group, respectively. These observations indicated that both Dex and TGF-β1 ex-

erted marked antiproliferative effects on prostate cancer cells, which was in agreement with a previous study (11). Cotreatment of PC-3 cells with Dex and TGF-β1 had an additive inhibitory effect on cell proliferation. The cell number decreased by up to 70% compared with that of the control group (Fig. 1).

*Dex increases the expression of TβRII in PC-3 cells*

To determine whether Dex enhances the inhibitory effect of TGF-β1 by regulating the expression of TGF-β1 receptors, we firstly examined the effect of Dex on the mRNA level of TGF-β1 receptors in PC-3 cells by RT-PCR. Results showed that Dex did not alter the level of TβRI mRNA but increased the expression of TβRII in a time-

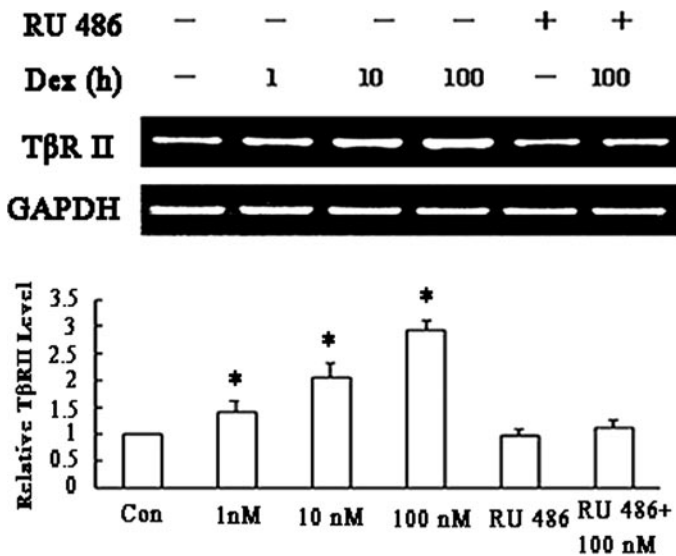

FIG. 3. Increased mRNA level of TβRII induced by Dex is blocked by GR antagonist RU486. PC-3 cells were treated with 1–100 nM Dex and/or 1 μM RU486 for 16 h. RT-PCR was performed as described in Materials and Methods. Relative densitometric units of TβRII/GAPDH are shown in the lower panel, with the density of the control bands set at 1.0.  $P < 0.05$ . \*, Statistically significant difference between a testing group and the control group (Con, vehicle treated).

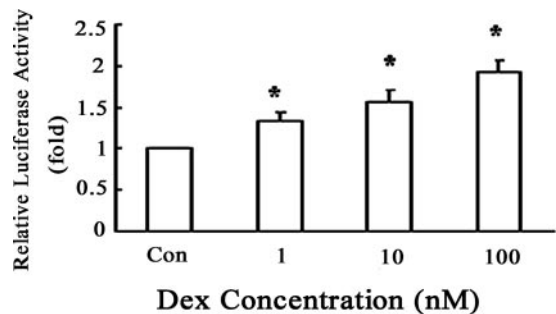

FIG. 4. Dex increases TβRII promoter activity in PC-3 cells. PC-3 cells were transiently cotransfected with 1 μg of TβRII promoter-Luc and 30 ng of TK-Renilla construct. Transfected cells were treated with ethanol vehicle or 1–100 nM Dex for 24 h, and the luciferase activities were measured. The columns indicate fold induction in TβRII promoter-Luc activity relative to the level in vehicle-treated control cells (Con). The activity in the control was set at 1.0. The results are means ± SD from three independent experiments.  $P < 0.05$ . \*, Statistically significant difference between a Dex-treated group and the control.



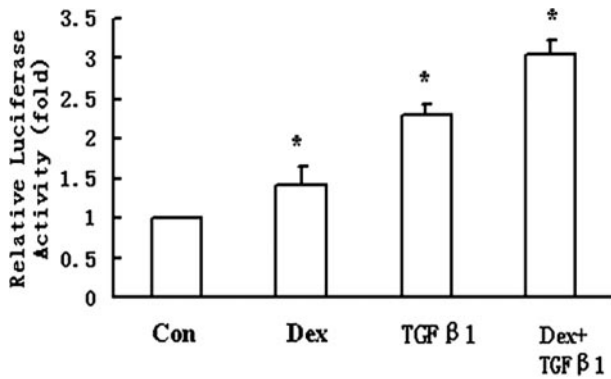

FIG. 5. Dex enhances TGF- $\beta$ 1-induced reporter gene expression. PC-3 cells were transiently transfected with a TGF- $\beta$ 1/Smad-responsive promoter construct (p3TP-Luc). Twelve hours later, cells were treated with 100 nM Dex or 10 ng/ml TGF- $\beta$ 1 for another 24 h and then harvested for detecting luciferase activity. The columns indicated means  $\pm$  SD for 3TP-Luc activity relative to the level in vehicle-treated control cells (Con), which was set at 1.0.  $P < 0.05$ . \*, Statistically significant difference between a treated group and the control.

dependent manner (Fig. 2A). T $\beta$ RII mRNA increased about 2.5-fold after 16 h treatment with 100 nM Dex. A similar increase of T $\beta$ RII expression at the protein level was observed after 36 h treatment with 100 nM Dex (Fig. 2B).

#### GR mediates the up-regulatory effect of Dex on T $\beta$ RII expression

PC-3 cells were treated with ethanol vehicle, 1–100 nM Dex, 1  $\mu$ M RU486 (a GR antagonist), or a combination of 100 nM Dex with 1  $\mu$ M RU486 for 16 h. T $\beta$ RII mRNA in the cells was measured by RT-PCR. As shown in Fig. 3, Dex increased the expression of T $\beta$ RII mRNA in a dose-dependent manner, which could be blocked by RU486. The results indicated that the up-regulatory effect of Dex on the expression of T $\beta$ RII was mediated by the GR.

#### Dex increases T $\beta$ RII promoter activity in PC-3 cells

To determine whether increased expression of T $\beta$ RII mRNA induced by Dex was due to GR-dependent transcriptional activation or stabilization of existing T $\beta$ RII transcripts, a fusion construct containing the full-length T $\beta$ RII promoter (–1883/+50) attached to a luciferase reporter was transiently transfected into PC-3 cells. Analysis of transcriptional regulation of T $\beta$ RII in the cells was performed by the luciferase assay as described in *Materials and Methods*. Figure 4 shows the dose-dependent activation of luciferase resulted from the treatment with various concentrations of Dex. The luciferase activity of cells treated with 100 nM Dex was 2.0-fold compared with that of control cells. This induced expression of luciferase was similar to the increased level of

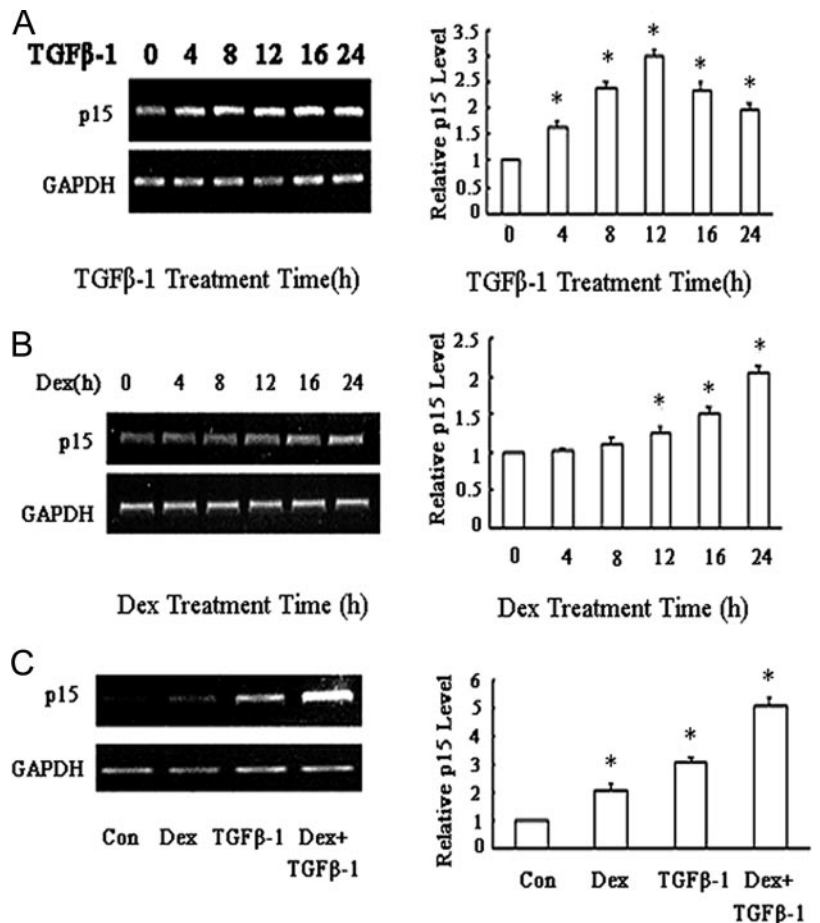

FIG. 6. Dex and TGF- $\beta$ 1 up-regulate expression of cell cycle-negative regulator p15. Cells were treated with either 10 ng/ml TGF- $\beta$ 1 (A) or 100 nM Dex (B) for different periods of time or with a combination of 10 ng/ml TGF- $\beta$ 1 and 100 nM Dex (C) for 12 h. RNA was isolated from the cells and the expression of p15 mRNA was analyzed by RT-PCR. The expression of p15 (relative densitometric units of GAPDH, which have been set at 1.0) is shown in *right panels*.  $P < 0.05$ . \*, Statistically significant difference between a treated group and the control group.

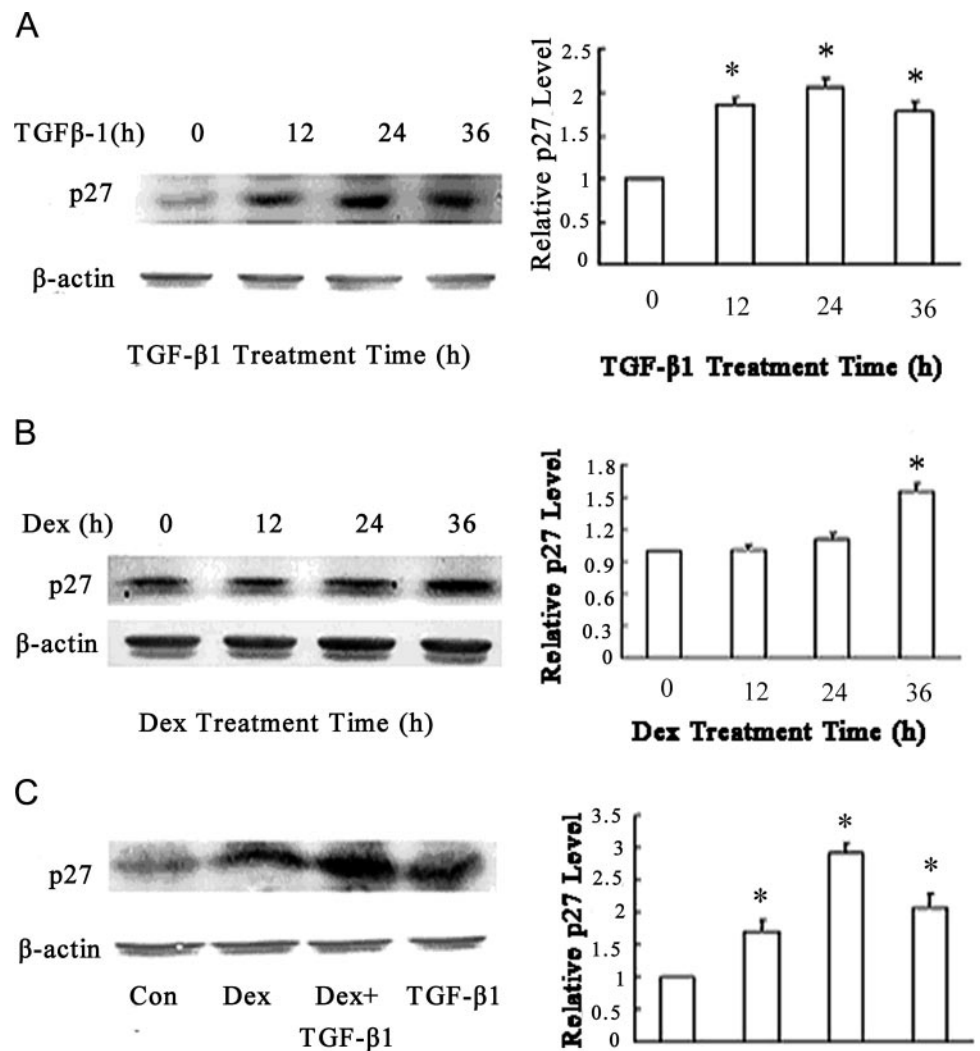

FIG. 7. Dex and TGF- $\beta$ 1 up-regulate expression of cell cycle-negative regulator p27. Cells were treated with either 10 ng/ml TGF- $\beta$ 1 (A) or 100 nM Dex (B) for different periods of time or with a combination of 10 ng/ml TGF- $\beta$ 1 and 100 nM Dex (C) for 24 h. Whole cell lysates were prepared at set time points. p27 Protein expression was determined by Western blot analysis. The expression of p27 (relative densitometric units of  $\beta$ -actin, which have been set at 1.0) is shown in the right panels. The results shown are means from three independent experiments.  $P < 0.05$ . \*, Statistically significant difference between a treated group and the control.

T $\beta$ RII mRNA after the Dex treatment, indicating that increased expression of T $\beta$ RII mRNA induced by Dex occurred at the transcriptional level and through increasing T $\beta$ RII promoter activity in PC-3 cells.

#### Dex enhances TGF- $\beta$ signaling in PC-3 cells

Because the T $\beta$ RII expression level was increased by Dex treatment, Dex might enhance TGF- $\beta$ 1 signaling and its downstream events, and increase the response of cells to TGF- $\beta$ 1. To test this hypothesis, we transiently transfected PC-3 cells with a TGF- $\beta$ 1/Smad reporter vector p3TP-Luc. This vector contains a luciferase gene whose promoter has a TGF- $\beta$ 1 response element. The effect of Dex on the luciferase expression mediated by TGF- $\beta$ 1 was determined by the luciferase assay. As shown in Fig. 5, 100 nM Dex alone only induced a 1.5-fold increase of luciferase activity, but it further increased TGF- $\beta$ 1-induced luciferase activity up to 3-fold when combined with 10 ng/ml TGF- $\beta$ 1.

#### Dex and TGF- $\beta$ 1 up-regulate the expression of cell cycle-negative regulators p15 and p27 in PC-3 cells

TGF- $\beta$ 1 exerts its antiproliferative effect by inducing the expression of CKIs, such as p15 and p27, which have been identified as inducers of cell cycle arrest at the G1 checkpoint. To further elucidate the mechanism of enhanced TGF- $\beta$ 1 inducing growth inhibitory effect of Dex, effects of Dex or TGF- $\beta$ 1 alone, or both on the expression of p15 and p27 in PC-3 cells were examined.

RT-PCR analysis showed that 10 ng/ml TGF- $\beta$ 1 induced the expression of p15 mRNA in a time-dependent fashion (Fig. 6). The maximum induction was approximately 3.0-fold higher than that in the control at 12 h. Dex alone (100 nM) also had a weak and time-delayed induction effect on the expression of p15 mRNA, compared with that of TGF- $\beta$ 1 (Fig. 6B). Treatment of PC-3 cells with 100 nM Dex markedly increased TGF- $\beta$ 1-induced expression of p15 mRNA (up to 5-fold) (Fig. 6C, lane 4).

Previous studies have indicated that the regulatory mechanism of p27 expression was complex and several levels of

the regulation were involved. For example, some agents, such as 1, 25-(OH) $_2$  vitamin D $_3$ , exert antiproliferative effects on a human prostate cancer cell line LN-CaP through stabilizing p27 protein instead of increasing mRNA level (28). Therefore, the expression of p27 was examined by Western blot analysis. A similar induction of p27 protein by TGF- $\beta$ 1 and Dex was observed in this study. As shown in Fig. 7A, exposure of PC-3 cells to TGF- $\beta$ 1 resulted in a time-dependent increase ( $\sim$ 2.0-fold) of p27 protein expression, compared with that in control cells at 24 h. Dex at 100 nM alone also slightly increased the expression of p27 protein in a time-delayed manner (Fig. 7B). Combined treatment with Dex and TGF- $\beta$ 1 resulted in a 3.0-fold increase of p27 expression (Fig. 7C, lane 3), significantly higher than that with TGF- $\beta$ 1 alone.

#### T $\beta$ RII-neutralizing antibody partially blocks the growth-inhibitory action of Dex

We further tested the ability of a neutralizing antibody specifically against the extracellular domain of T $\beta$ RII to block the growth-inhibitory action of Dex on PC-3 cells using the MTT reduction cell proliferation assay. Results showed that either 100 nM Dex or 10 ng/ml TGF- $\beta$ 1 markedly inhibited the proliferation of PC-3 cells. Treatment of PC-3 cells with the anti-T $\beta$ RII polyclonal antibody at a concentration of 20  $\mu$ g/ml completely blocked the inhibitory effect of 10 ng/ml TGF- $\beta$ 1, but partially blocked the growth inhibitory action of 100 nM Dex in these cells (Fig. 8), indicating that TGF- $\beta$ 1 signaling was involved in the proliferative inhibition of PC-3 cells by Dex, but there might be other mechanisms responsible for the antiproliferative effect of glucocorticoids.

#### Dex inhibits the transcriptional activity of NF- $\kappa$ B and IL-6 expression in PC-3 cells

Recently, NF- $\kappa$ B is hypothesized to contribute to the development and/or progression of androgen-independent

prostate cancer cells by regulating the expression of genes involved in cell growth, antiapoptosis and metastasis (29). Therefore, we examined whether Dex exerted its antitumor effect by suppressing NF- $\kappa$ B activation and inhibiting the expression of its target genes, IL-6 in human PC-3 cells. PC-3 cells were transfected with NF- $\kappa$ B-specific reporter plasmid and were incubated for 12 h. Then, the cells were treated with different concentrations of Dex for 18 h or treated with 100 nM Dex for different time periods for NF- $\kappa$ B activity assay. The results showed that Dex decreased the transcriptional activity of NF- $\kappa$ B in a dose- and time-dependent manner. Inhibition of  $38 \pm 1.8\%$  was observed in PC-3 cells treated with 100 nM Dex for 18 h (Fig. 9). Dex also inhibited the expression of the NF- $\kappa$ B-dependent cytokine IL-6 in PC-3 cells. Treatment of PC-3 cells with 100 nM Dex for 12 h resulted in a 34.6% decrease of IL-6 mRNA level tested by RT-PCR (Fig. 10).

## Discussion

Previous studies (14) have demonstrated that glucocorticoids have inhibitory effects on AIPC *in vitro* and *in vivo*. The

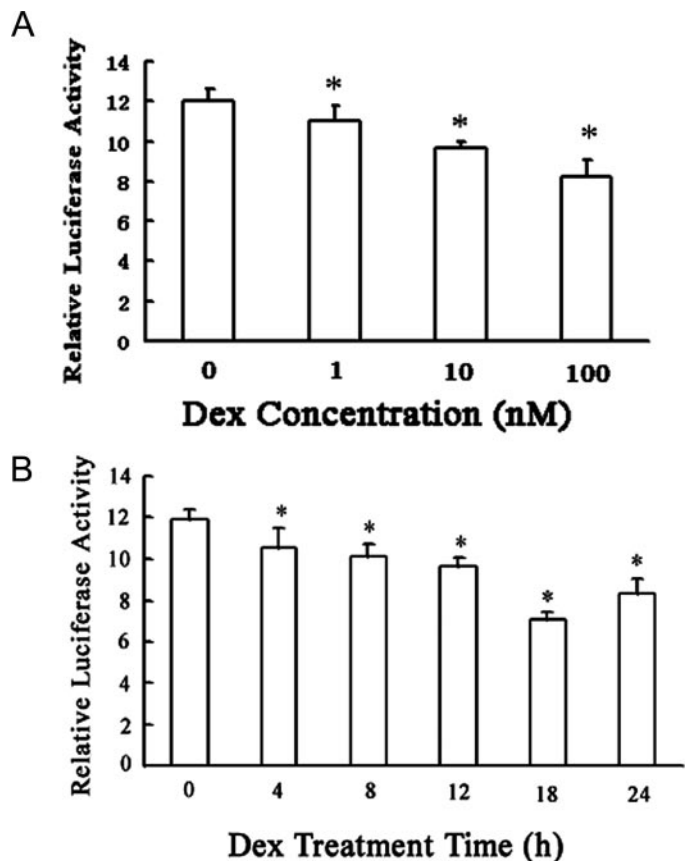

FIG. 8. T $\beta$ RII-neutralizing antibody blocks inhibitory effects of Dex on the growth of PC-3 cells. PC-3 cells were pretreated with 20  $\mu$ g/ml T $\beta$ RII neutralizing antibody or 20  $\mu$ g/ml control IgG for 3 h, and then treated with 10 ng/ml TGF- $\beta$ 1 or 100 nM Dex. Cells were allowed to grow for 6 d with renewing the medium every other day. MTT reduction method was used to determine cell proliferation. Results are expressed as means  $\pm$  SD of quadruple determinations. \*, Significantly inhibitory effect ( $P < 0.05$ ) of TGF- $\beta$  or Dex on the growth of PC-3 cells. #, Significant blocking of the inhibitory effect ( $P < 0.05$ ) of TGF- $\beta$  or Dex on the growth of PC-3 cells by T $\beta$ RII neutralizing antibody.

FIG. 9. Dex decreases the transcriptional activity of NF- $\kappa$ B in a dose- and time-dependent manner in PC-3 cells. PC-3 cells were cotransiently transfected with 0.4  $\mu$ g of pGL3-NF- $\kappa$ B-luc and 1 ng of pRL-TK-Renilla-luc. Transfected cells were treated with ethanol vehicle or 1–100 nM Dex for 18 h (A), or 100 nM Dex for 0–24 h (B), then the luciferase activities were measured. Data were normalized for transfection efficiency by dividing firefly luciferase activity with that of Renilla luciferase. The results shown are means from three independent experiments.  $P < 0.05$ . \*, Statistically significant difference between Dex-treated group and the control.



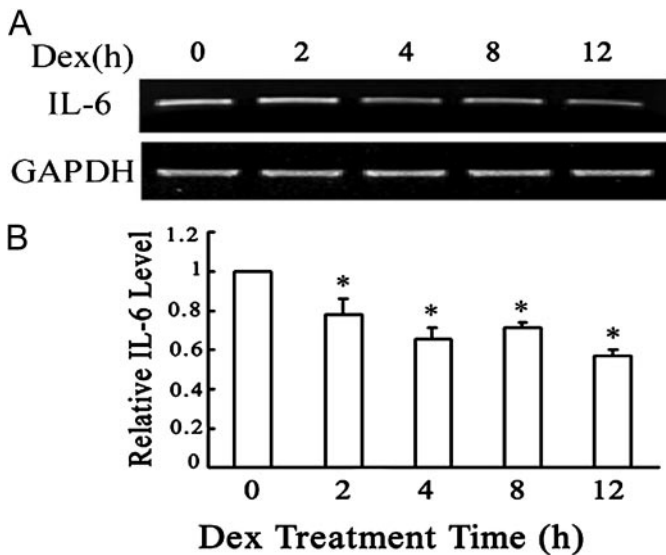

FIG. 10. Dex inhibits the expression of IL-6 mRNA in PC-3 cells. A, RT-PCR analysis of IL-6 mRNA in PC-3 cells treated with the vehicle or 100 nM Dex for different times. GAPDH was included as an internal control. B, Densitometric analysis of IL-6 mRNA expression shown in A. Relative densitometric units of IL-6/GAPDH are shown in the lower panel, with the density of the control bands set at 1.0.  $P < 0.05$ . \*, Statistically significant difference between Dex treatment and the vehicle treatment.

effects are associated with several potential mechanisms: down-regulation of adrenal androgens, modulation of cellular growth factors, such as up-regulation of TGF- $\beta$ 1 and down-regulation of androgen receptor-dependent transcription. However, our understanding about the mechanisms by which glucocorticoids affect AIPC is far from complete.

Previous work of other researchers (11) has demonstrated that PC-3 cells contain functional GR and Dex inhibits the proliferation of these cells. Moreover, Dex up-regulates TGF- $\beta$ 1 that partially mediates the growth inhibitory effect of Dex on PC-3 cells. We found in the present study that cotreatment of PC-3 cells with Dex and TGF- $\beta$ 1 resulted in a further decrease in cell proliferation compared with treatment with exogenous TGF- $\beta$ 1 alone, suggesting that Dex significantly potentiates the antiproliferative effect of TGF- $\beta$ 1 on PC-3 cells. This result also presents a possibility that Dex may increase the sensitivity of PC-3 cells to the growth inhibitory effect of TGF- $\beta$ 1 or enhance the response of PC-3 cells to TGF- $\beta$ 1.

Treatment of PC-3 cells with Dex increased the expression of T $\beta$ R2 mRNA and protein, but not T $\beta$ R1. The similar effects were also observed in an ovarian cancer cell line HO-8910 (30), indicating that this regulation was not cell type specific. T $\beta$ R2, but not T $\beta$ R1, is also up-regulated by androgen, retinoid acid, and 1,25(OH) $_2$ D $_3$  (31–35). Moreover, the expression and function of T $\beta$ R2 are frequently altered in many human cancers including prostate cancer (36–39), suggesting that T $\beta$ R2 was a critical signaling effector of TGF- $\beta$ 1 and regulatory mechanisms of T $\beta$ R2 and T $\beta$ R1 were different.

To determine whether the up-regulation of T $\beta$ R2 mRNA by Dex was achieved through increasing new mRNA synthesis, or through stabilizing the existing T $\beta$ R2 transcripts, the analysis of the transcriptional regulation of T $\beta$ R2 in PC-3

cells was performed by the T $\beta$ R2 promoter luciferase assay. The results showed that Dex treatment of PC-3 cells transiently transfected with T $\beta$ R2 promoter driven luciferase reporter gene caused a dose-dependent increase in luciferase activity, indicating that Dex increased the expression of T $\beta$ R2 at a transcriptional level. GR-mediated stimulation of the gene expression usually takes place when the ligand-activated GR directly interacts with a glucocorticoid response element (GRE), present in the target gene. There are several potential GREs in the T $\beta$ R2 enhancer and promoter region scanned with the Bioinformatics & Molecular Analysis Section system from the web site <http://www-bimas.cit.nih.gov/molbio/signal/>. Glucocorticoids may up-regulate T $\beta$ R2 gene expression by inducing the binding of the GR to GRE in this region. Further work is needed to clarify this postulation.

Because T $\beta$ R2 is a critical signaling effector in the TGF- $\beta$  signal transduction pathway, increase of T $\beta$ R2 expression by Dex should enhance TGF- $\beta$ 1 signaling and therefore change the molecular events of the downstream of TGF- $\beta$ 1 signaling, such as increasing target gene expression. In this study, we showed that TGF- $\beta$ 1 signaling in PC-3 cells was increased after treatment with Dex, as determined by a TGF- $\beta$ /Smad-responsive reporter gene (3TP-Luc) assay that has been extensively used for estimating TGF- $\beta$  responsiveness.

We also found that cotreatment with Dex and TGF- $\beta$ 1 resulted in a further increase of the expression of p15 mRNA and p27 protein in PC-3 cells compared with the treatment with TGF- $\beta$ 1 alone. Both p15 and p27 play critical roles in lengthening G1 phase in the cell cycle and TGF- $\beta$ 1 mediated cell growth arrest (40, 41). p15 is a member of the Ink4 family that exclusively inhibits cyclin D-CDK (cyclin-dependent kinase) 4/CDK6 complexes, which prevents the phosphorylation and inactivation of the RB protein, thereby resulting in arrest of the cell cycle at the G1 phase. In contrast, p27 belongs to the Kip/Cip family that are considered as universal inhibitors because they can down-regulate the activities of cyclin D-CDK4/CDK6, cyclin E-CDK2, and cyclin A-CDK2 complexes. These results are consistent with our observation that Dex enhances the growth inhibitory effect of TGF- $\beta$ 1. The mechanism whereby Dex increases these two CKIs levels is unclear. It is interesting to know whether the up-regulation of p15 and p27 by Dex is the direct effect of glucocorticoid-GR complex or via inducing the endocrine TGF- $\beta$ 1 signaling pathway or some other pathway.

We further examined effects of anti-T $\beta$ R2 antibody on Dex-induced inhibition on the proliferation of PC-3 cells and found that the inhibitory effect of Dex on PC-3 cells was partially reversed by a neutralizing antibody specific to the extracellular domain of T $\beta$ R2. A similar result using antibody to TGF- $\beta$ 1 was also reported by Carlos Reyes-Moreno (11), indicating that Dex suppressed proliferation of PC-3 cells not only by the up-regulation of TGF- $\beta$ 1, but also by inducing its receptor, T $\beta$ R2, thereby enhancing the cell sensitivity to TGF- $\beta$ 1. In this study, we observed that the antiproliferative effect of glucocorticoid could only partially be blocked by antibody T $\beta$ R2; thus, there might exist other mechanisms or pathways involved in the growth inhibitory effect of glucocorticoid.

Previous studies (42–45) showed that transcription factor

NF- $\kappa$ B activity was constitutively activated in androgen receptor-negative prostate cancer cells, such as PC-3 cells. IL-6, an NF- $\kappa$ B inducible gene, was an autocrine growth factor for prostate cancer cells, and androgen-independent prostate cancer cells were dependent on the cytokine IL-6 for their growth. We found that Dex inhibited the transcriptional activity of NF- $\kappa$ B and decreased IL-6 mRNA levels in PC-3 cells. These observations suggested that the inhibition of the NF- $\kappa$ B-IL-6 pathway might be another mechanism besides the TGF- $\beta$ 1 signaling pathway responsible for the antitumor activity of Dex against AIPC.

Taken together, our results suggested that glucocorticoid exerts its role of antiproliferation through a complex process. There were at least two mechanisms, by which glucocorticoid inhibits the proliferation in PC-3 cells. One mechanism is by inducing growth-inhibitory factors and/or their receptors, such as up-regulation of T $\beta$ RII and enhancing TGF- $\beta$ 1 signaling. Another mechanism is by decreasing the expression of growth-stimulatory factors such as IL-6, through suppressing the transcriptional activities of other transcription factors, including NF- $\kappa$ B.

### Acknowledgments

We thank Dr. James W. Freeman for kindly providing us with the full-length T $\beta$ RII promoter luciferase reporter construct and Dr. Joan Massagué for p3TP-Luc construct. We also thank Ms. Tamara Newsome for her assistance in editing this manuscript.

Received April 24, 2006. Accepted July 27, 2006.

Address all correspondence and requests for reprints to: Dr. Jian Lu, Ph.D., Department of Pathophysiology, Second Military Medical University, Shanghai 200433, People's Republic of China. E-mail: lujian326@yahoo.com.

This work was supported by the National Natural Science Foundation of China (No. 30470671).

Disclosure Statement: The authors have nothing to disclose.

### References

- Frankfurt O, Rosen ST 2004 Mechanisms of glucocorticoid-induced apoptosis in hematologic malignancies: updates. *Curr Opin Oncol* 16:553–563
- Yamamoto T, Nishiguchi M, Inoue N, Goto HG, Kudawara I, Ueda T, Yoshikawa H, Tanigaki Y, Nishizawa Y 2002 Inhibition of murine osteosarcoma cell proliferation by glucocorticoid. *Anticancer Res* 22:4151–4156
- Kudawara I, Ueda T, Yoshikawa H, Miyama T, Yamamoto T, Nishizawa Y 2001 In vivo inhibition of tumour growth by dexamethasone in murine osteosarcomas. *Eur J Cancer* 37:1703–1708
- Boulanger J, Reyes-Moreno C, Koutsilieris M 1995 Mediation of glucocorticoid receptor function by the activation of latent transforming growth factor  $\beta$ 1 in MG-63 human osteosarcoma cells. *Int J Cancer* 61:692–697
- Ramos RA, Nishio Y, Maiyar AC, Simon KE, Ridder CC, Ge Y, Firestone GL 1996 Glucocorticoid-stimulated CCAAT/enhancer-binding protein  $\alpha$  expression is required for steroid-induced G1 cell cycle arrest of minimal-deviation rat hepatoma cells. *Mol Cell Biol* 16:5288–301
- Cram EJ, Ramos RA, Wang EC, Cha HH, Nishio Y, Firestone GL 1998 Role of the CCAAT/enhancer binding protein- $\alpha$  transcription factor in the glucocorticoid stimulation of p21waf1/cip1 gene promoter activity in growth-arrested rat hepatoma cells. *J Biol Chem* 273:2008–2014
- Goya L, Maiyar AC, Ge Y, Firestone GL 1993 Glucocorticoids induces a G1/G0 cell arrest of Con8 rat mammary tumor cells that is synchronously reversed by steroid withdrawal or addition of transforming growth factor- $\alpha$ . *Mol Endocrinol* 7:1121–1132
- Xia B, Lu J, Wang G 2003 Glucocorticoid modulation of extracellular signal-regulated protein kinase 1/2 and p38 in human ovarian cancer HO-8910 cells. *Chin Med J (Engl)* 116:753–756
- Xu M, Song L, Wang Z 2003 Effects of dexamethasone on glucocorticoid receptor expression in a human ovarian carcinoma cell line 3AO. *Chin Med J (Engl)* 116:392–395
- Ferrandina G, Scambia G, Benedetti Panici P, Bonanno G, De Vincenzo R, Rumi C, Bussa S, Genuardi M, Spica Romano V, Mancuso S 1992 Effects of dexamethasone on the growth and epidermal growth factor receptor expression of the OVCA 433 ovarian cancer cells. *Mol Cell Endocrinol* 83:183–193
- Reyes-Moreno C, Frenette G, Boulanger J, Lavergne E, Govindan MV, Koutsilieris M 1995 Mediation of glucocorticoid receptor function by transforming growth factor  $\beta$  1 expression in human PC-3 prostate cancer cells. *Prostate* 26:260–269
- Dondi D, Maggi R, Scaccianoce E, Martini L, Motta M, Poletti A 2001 Expression and role of functional glucocorticoid receptors in the human androgen-independent prostate cancer cell line, DU145. *J Mol Endocrinol* 26:185–191
- Nishimura K, Nonomura N, Satoh E, Harada Y, Nakayama M, Tokizane T, Fukui T, Ono Y, Inoue H, Shin M, Tsujimoto Y, Takayama H, Aozasa K, Okuyama A 2001 Potential mechanism for the effects of dexamethasone on growth of androgen-independent prostate cancer. *J Natl Cancer Inst* 93:1739–1746
- Fakih M, Johnson CS, Trump DL 2002 Glucocorticoids and treatment of prostate cancer: a preclinical and clinical review. *Urology* 60:553–561
- Hayashi R, Wada H, Ito K, Adcock IM 2004 Effects of glucocorticoids on gene transcription. *Eur J Pharmacol* 1:51–62
- Dostert A, Heinzel T 2004 Negative glucocorticoid receptor response elements and their role in glucocorticoid action. *Curr Pharm* 10:2807–2816
- Almawi WY, Abou Jaoude MM, Li XC 2002 Transcriptional and post-transcriptional mechanisms of glucocorticoid antiproliferative effects. *Hematol Oncol* 20:17–32
- Wilding G 1991 Response of prostate cancer cells to peptide growth factor: transforming growth factor- $\beta$ . *Cancer Surv* 11:147–163
- Sutkowski DM, Fong CJ, Sensibar JA, Rademaker AW, Sherwood ER, Kozlowski JM, Lee C 1992 Interaction of epidermal growth factor and transforming growth factor- $\beta$ 1 in human prostatic epithelial cells in culture. *Prostate* 21:133–143
- Massague J 1992 Receptors for the TGF- $\beta$  family. *Cell* 69:1067–1070
- Massague J, Wotton D 2000 Transcriptional control by the TGF- $\beta$ /Smad signaling system. *EMBO J* 19:174517–174554
- Massague J 1998 TGF- $\beta$  signal transduction. *Annu Rev Biochem* 67:753–791
- Hoodless PA, Haerry T, Abdollah S, Stapleton M, O'Connor MB, Attisano L, Wrana JL 1996 MADR1, a MAD-related protein that functions in BMP2 signaling pathways. *Cell* 85:489–500
- Zhang Y, Feng X, We R, Derynck R 1996 Receptor-associated Mad homologues synergize as effectors of the TGF- $\beta$  response. *Nature* 383:168–172
- Nemeth JA, Sensibar JA, White RR, Zelner DJ, Kim IY, Lee C 1997 Prostatic ductal system in rats: tissue-specific expression and regional variation in stromal distribution of transforming growth factor- $\beta$ 1. *Prostate* 33:64–71
- Kim IY, Ahn HJ, Zeiner DJ, Park L, Sensibar JA, Lee C 1996 Expression and localization of transforming growth factor- $\beta$  receptors type I and II in the rat ventral prostate during regression. *Mol Endocrinol* 10:107–115
- Goustin AS, Leof EB, Shipley GD, Moses HL 1986 Growth factors and cancer. *Cancer Res* 46:1015–1029
- Yang ES, Burnstein KL 2003 Vitamin D inhibits G1 to S progression in LNCaP prostate cancer cells through p27Kip1 stabilization and Cdk2 mislocalization to the cytoplasm. *J Biol Chem* 278:46862–46868
- Suh J, Rabsion AB 2004 NF- $\kappa$ B activation in human prostate cancer: important mediator or epiphenomenon? *J Cell Biochem* 91:100–117
- Xia B, Lu J 2003 Regulation of transforming growth factor- $\beta$  type II receptor expression in human ovarian cancer HO-8910 cells by glucocorticoid. *China Oncol* 39:868–871
- Murthy S, Weigel NL 2004  $1\alpha$ , 25-Dihydroxyvitamin D3 induced growth inhibition of PC-3 prostate cancer cells requires an active transforming growth factor  $\beta$  signaling pathway. *Prostate* 59:282–291
- Sun L, Wu G, Willson JK, Zborowska E, Yang J, Rajkarunayake I, Wang J, Gentry LE, Wang XF, Brattain MG 1994 Expression of transforming growth factor  $\beta$  type II receptor leads to reduced malignancy in human breast cancer MCF-7 cells. *J Biol Chem* 269:26449–26455
- Wu G, Fan RS, Li W, Srinivas V, Brattain MG 1998 Regulation of transforming growth factor- $\beta$  type II receptor expression in human breast cancer MCF-7 cells by vitamin D3 and its analogues. *J Biol Chem* 273:7749–7756
- Yoshizawa M, Miyazaki H, Kojima S 1998 Retinoids potentiate transforming growth factor- $\beta$  activity in bovine endothelial cells through up-regulating the expression of transforming growth factor- $\beta$  receptors. *J Cell Physiol* 176:565–573
- Hannon GJ, Beach D 1994 p15INK4B is a potential effector of TGF $\beta$ -induced cell cycle arrest. *Nature* 371:257–261
- Nerlich AG, Sauer U, Ruoss I, Hagedorn HG 2003 High frequency of TGF- $\beta$ -receptor-II mutations in microdissected tissue samples from laryngeal squamous cell carcinomas. *Lab Invest* 83:1241–1251
- Furuta K, Misao S, Takahashi K, Tagaya T, Fukuzawa Y, Ishikawa T, Yoshioka K, Kakumu S 1999 Gene mutation of transforming growth factor  $\beta$ 1 type II receptor in hepatocellular carcinoma. *Int J Cancer* 81:851–853
- Hougaard S, Norgaard P, Abrahamsen N, Moses HL, Spang-Thomsen M, Skovgaard, Poulsen H 1999 Inactivation of the transforming growth factor  $\beta$  type II receptor in human small cell lung cancer cell lines. *Br J Cancer* 79:1005–1011
- Williams RH, Stapleton AM, Yang G, Truong LD, Rogers E, Timme TL,



- Wheeler TM, Scardino PT, Thompson TC 1996 Reduced levels of transforming growth factor  $\beta$  receptor type II in human prostate cancer: an immunohistochemical study. *Clin Cancer Res* 2:635–640
40. Li JM, Nichols MA, Chandrasekharan S, Xiong Y, Wang XF 1995 Transforming growth factor- $\beta$  activates the promoter of cyclin-dependent kinase inhibitor p15INK4B through an sp1 consensus site. *J Biol Chem* 270:26705–26753
41. Polyak K, Kato JY, Solomon MJ, Sherr CJ, Massague J, Roberts JM, Koff A 1994 p27Kip1, a cyclin-Cdk inhibitor, links transforming growth factor- $\beta$  and contact inhibition to cell cycle arrest. *Genes Dev* 8:9–22
42. Drachenberg DE, Elgamal AA, Rowbotham R, Peterson M, Murphy GP 1999 Circulating levels of interleukin-6 in patients with hormone refractory prostate cancer. *Prostate* 41:127–133
43. Chung TD, Yu JJ, Spiotto MT, Bartkowski M, Simons JW 1999 Characterization of the role of IL-6 in the progression of prostate cancer. *Prostate* 38:199–207
44. Okamoto M, Lee C, Oyasu R 1997 Interleukin-6 as a paracrine and autocrine and autocrine growth factor in human prostatic carcinoma cells in vitro. *Cancer Res* 57:141–146
45. Smith PC, Keller ET 2001 Anti-interleukin-6 monoclonal antibody induces regression of human prostate cancer xenografts in nude mice. *Prostate* 48:47–53

*Endocrinology* is published monthly by The Endocrine Society (<http://www.endo-society.org>), the foremost professional society serving the endocrine community.
